# Supplementary material for: Highly efficient synthesis of a tristable molecular shuttle and its controlled motion under chemical stimuli
Source: Royal Society of Chemistry journal article supplement (doi:10.1039/c4ob01283f), 2014-07-16
Supplement: c4ob01283f1.pdf [file c4ob01283f1.pdf]

## Electronic Supplementary Information

### Highly Efficient Synthesis of A Tristable Molecular Shuttle and Its Controlled Motion by Chemical Stimuli

Zheng Meng,<sup>a, b</sup> and Chuan-Feng Chen<sup>\*a</sup>

<sup>a</sup>*Beijing National Laboratory for Molecular Sciences, CAS Key Laboratory of Molecular Recognition and Function, Institute of Chemistry, Chinese Academy of Sciences, Beijing 100190, China;* <sup>b</sup>*University of Chinese Academy of Sciences, Beijing 100049, China*

*E-mail:* cchen@iccas.ac.cn

#### Contents

|    |                                                                                                                                 |     |
|----|---------------------------------------------------------------------------------------------------------------------------------|-----|
| 1. | General Information .....                                                                                                       | S2  |
| 2. | Complexation of S1 and M under the Presence of K <sup>+</sup> .....                                                             | S2  |
| 3. | <sup>1</sup> H NMR, <sup>13</sup> C NMR, HSQC, HMBC, and ROESY Spectra Analysis of Three Stable States of the [2]Rotaxane ..... | S3  |
| 4. | HRMS Spectra for Three States of the [2]Rotaxane .....                                                                          | S16 |
| 5. | NMR Spectra for Other New Compounds .....                                                                                       | S18 |

## 1. General Information

Commercially available solvents and chemicals were used without further purification unless stated. Where dry solvents were used, they were degassed with Ar, dried by 4 Å molecular sieves activated under 500 °C for 6 hours. Melting points were not corrected. All yields were given as isolated yields. Standard abbreviations indicating multiplicity were used as follows: s (singlet), br (broad), d (doublet), t (triplet), q (quartet), m (multiplet).

## 2. Complexation of S1 and M under the Presence of K<sup>+</sup>

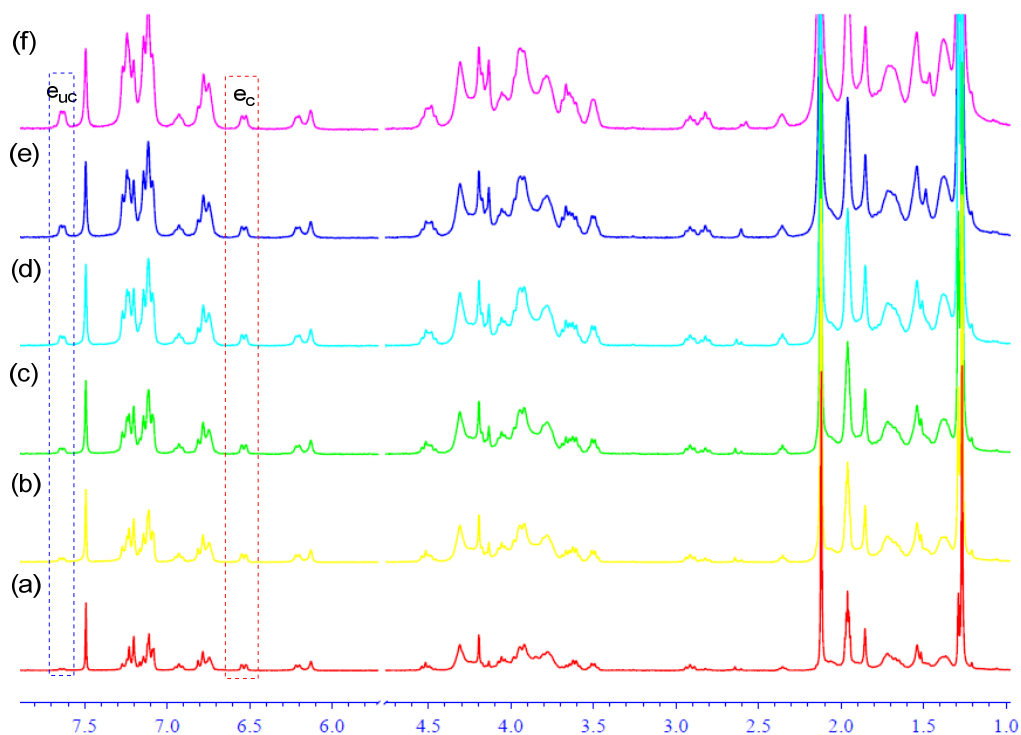

**Fig. S1** Partial <sup>1</sup>H NMR spectra (300 MHz, CD<sub>3</sub>CN/CDCl<sub>3</sub> = 1:1, 298 K) of mixture of **S1** and **M** in the presence of K<sup>+</sup> at mole ratio of [S1]/[M] = : (a) 1.2; (b) 1.4; (c) 1.6; (d) 1.8; (e) 2.0; (f) 2.2. ([M]<sub>0</sub> = 3.0 mM, and [KPF<sub>6</sub>] = 20.0 mM. The binding constant was calculated on the basis of the assumption that the binding of K<sup>+</sup> to **M** is essentially complete in a solution of **M** containing a large excess of potassium salts. )

### 3. $^1\text{H}$ NMR, $^{13}\text{C}$ NMR, HSQC, HMBC, and ROESY Spectra Analysis of Three Stable States of the [2]rotaxane

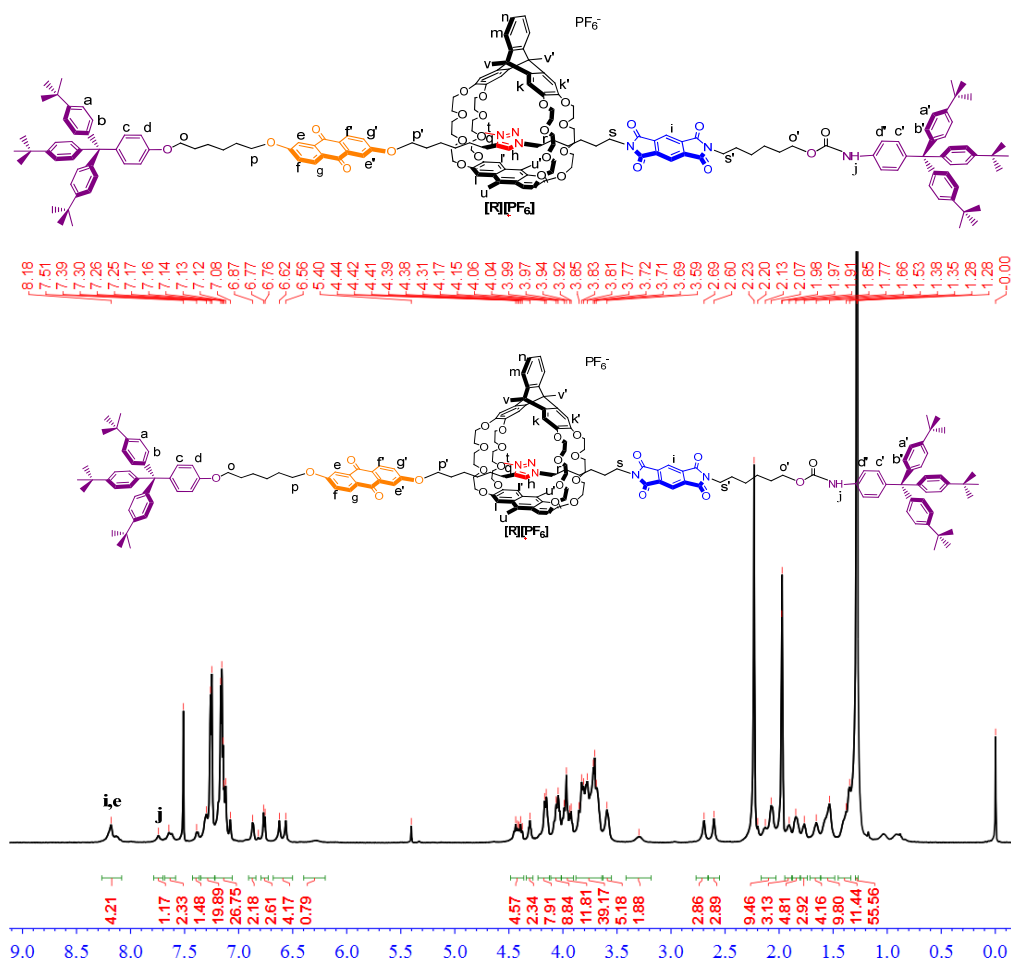

**Fig. S2**  $^1\text{H}$  NMR spectrum (CDCl<sub>3</sub>/CD<sub>3</sub>CN=1:1, 600 MHz, 278 K) of [2]rotaxane [R][PF<sub>6</sub>].

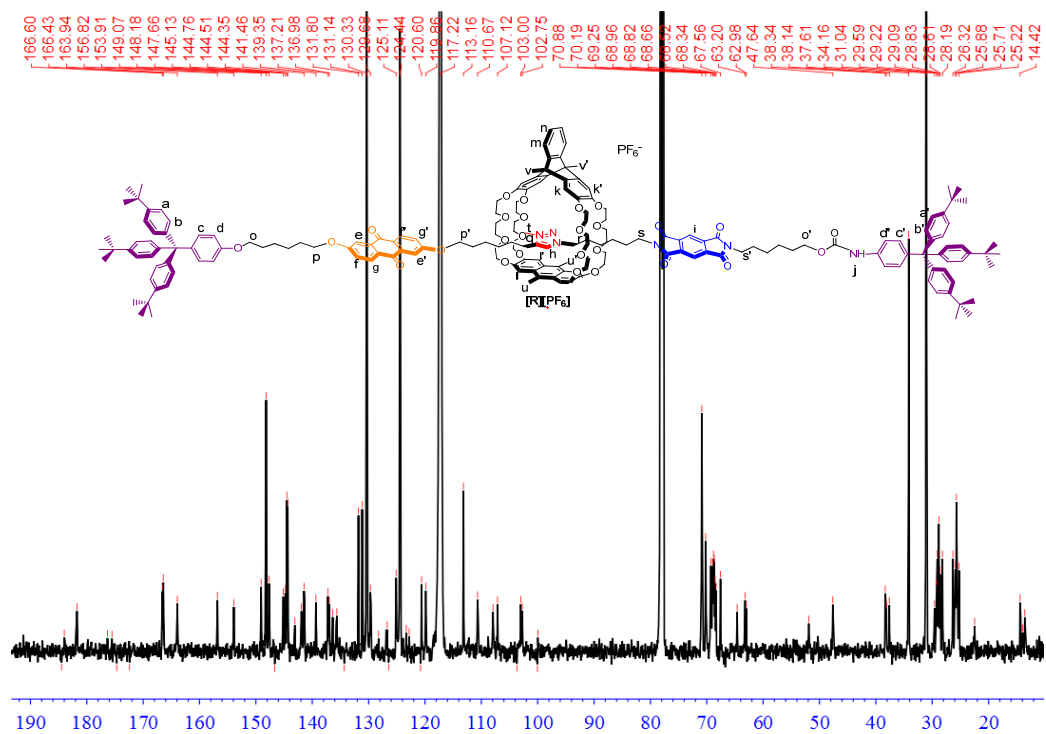

**Fig. S3**  $^{13}\text{C}$  NMR spectrum (CDCl<sub>3</sub>/CD<sub>3</sub>CN=1:1, 150 MHz, 278 K) of [2]rotaxane [R][PF<sub>6</sub>].

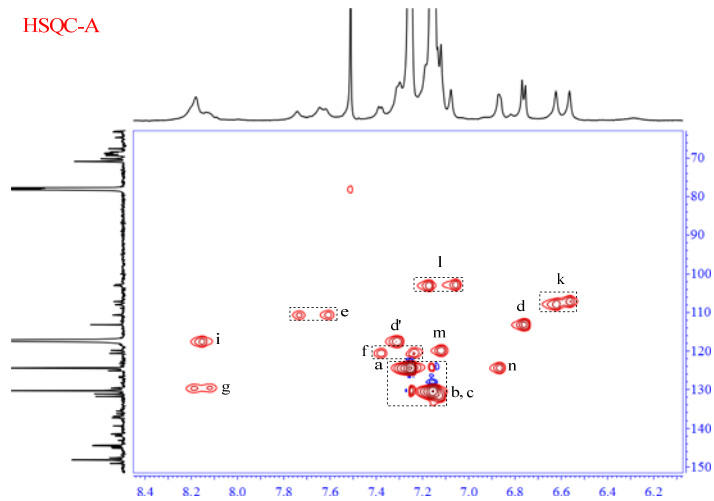

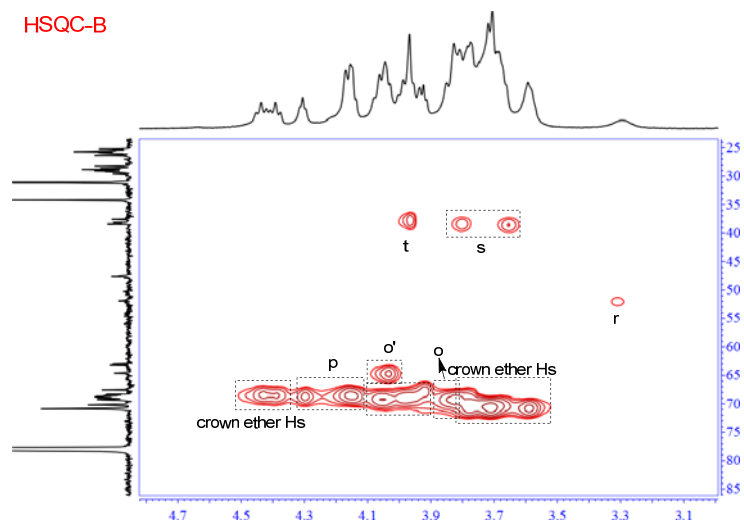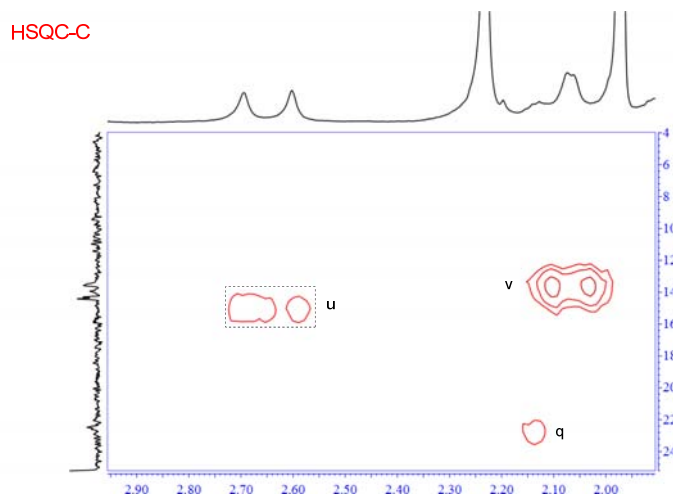

**Fig. S4** HSQC spectrum ( $\text{CDCl}_3/\text{CD}_3\text{CN}=1:1$ , 600 MHz, 278 K) of [2]rotaxane **[R]**[PF<sub>6</sub>].

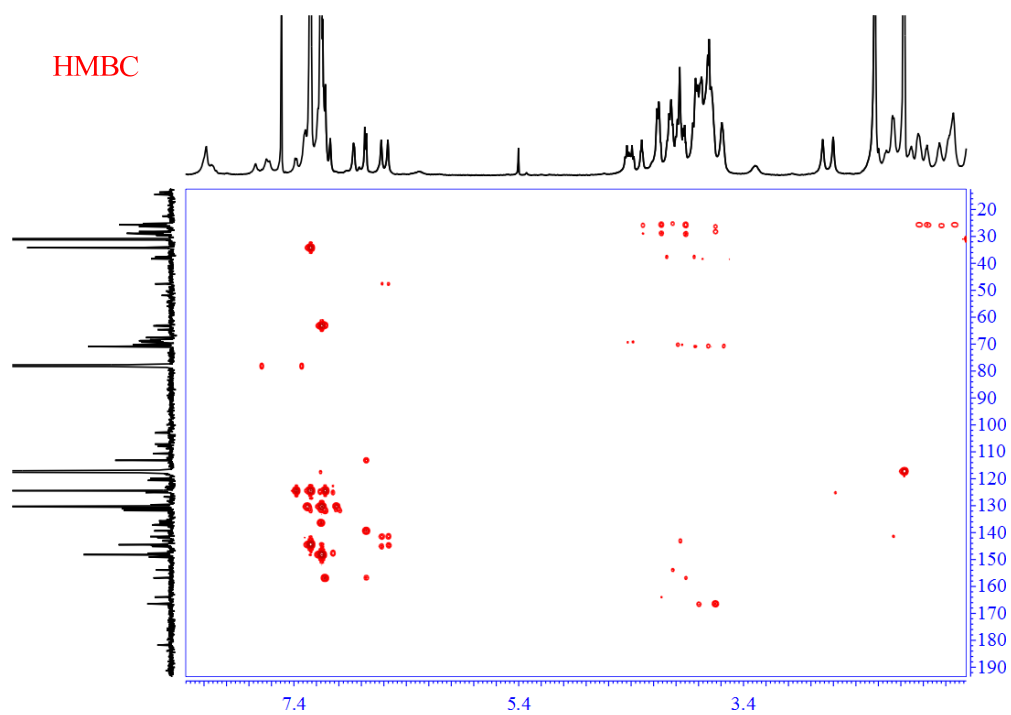

Fig. S5 HMBC spectrum ( $\text{CDCl}_3/\text{CD}_3\text{CN}=1:1$ , 600 MHz, 278 K) of [2]rotaxane **[R]**[PF<sub>6</sub>].

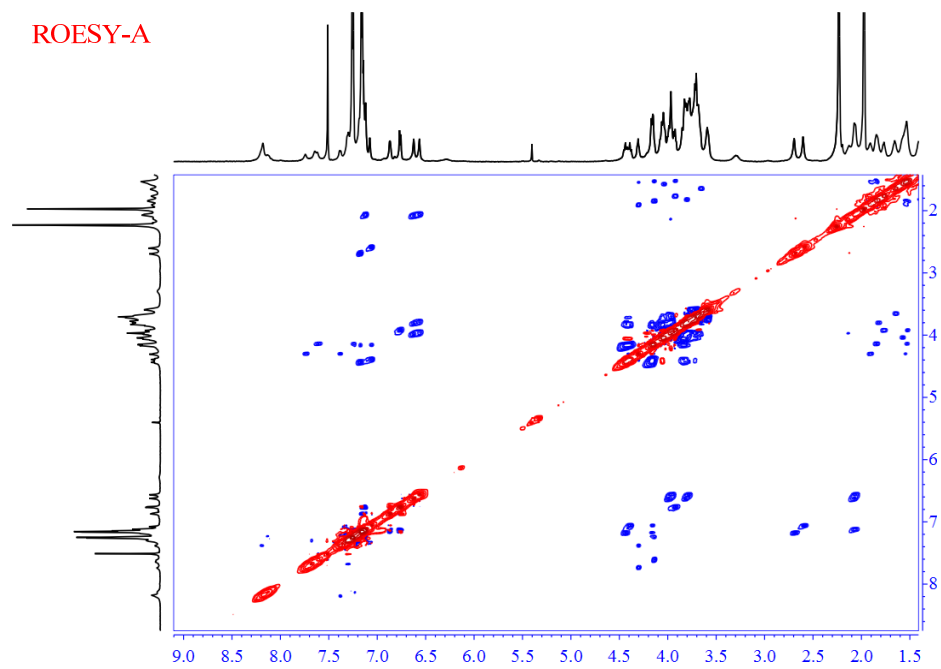

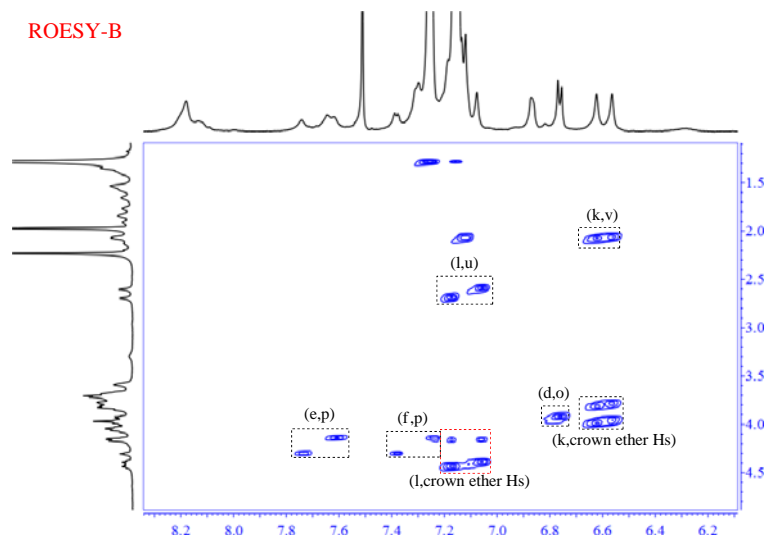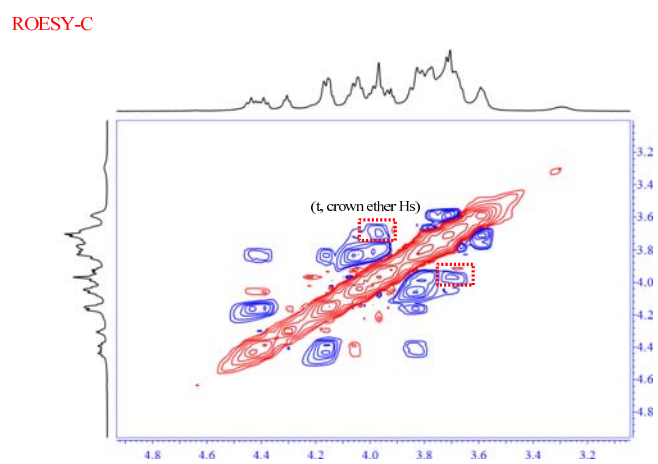

**Fig. S6** ROESY spectra ( $\text{CDCl}_3/\text{CD}_3\text{CN}=1:1$ , 600 MHz, 278 K) of [2]rotaxane  $[\mathbf{R}][\text{PF}_6]$ .

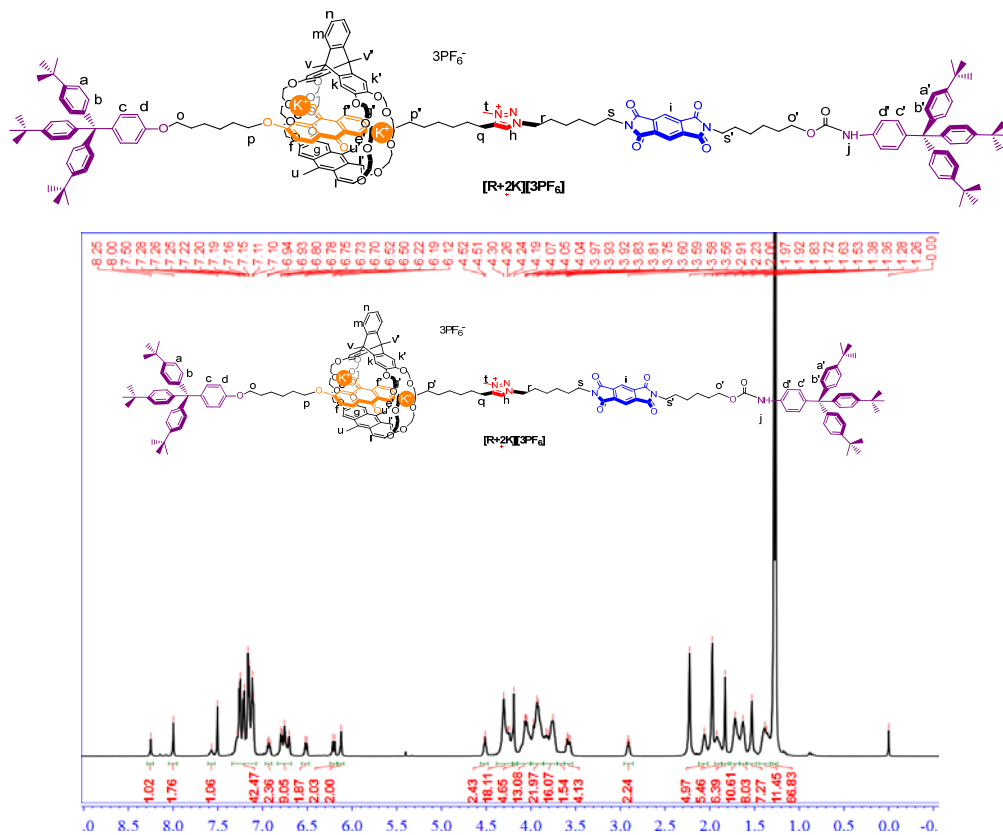

Fig. S7 <sup>1</sup>H NMR spectrum (CDCl<sub>3</sub>/CD<sub>3</sub>CN=1:1, 600 MHz, 278 K) of [2]rotaxane [R]<sub>2</sub>[PF<sub>6</sub>] after the addition of 4.0 equivalents of KPF<sub>6</sub>.

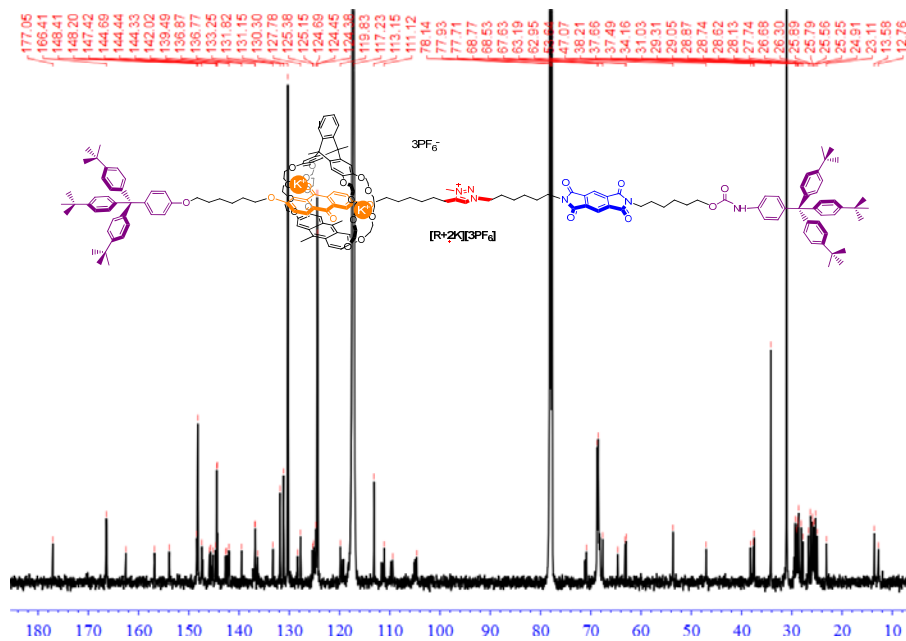

Fig. S8 <sup>13</sup>C NMR spectrum (CDCl<sub>3</sub>/CD<sub>3</sub>CN=1:1, 150 MHz, 278 K) of [2]rotaxane [R]<sub>2</sub>[PF<sub>6</sub>] after S8



the addition of 4.0 equivalents of  $\text{KPF}_6$ .

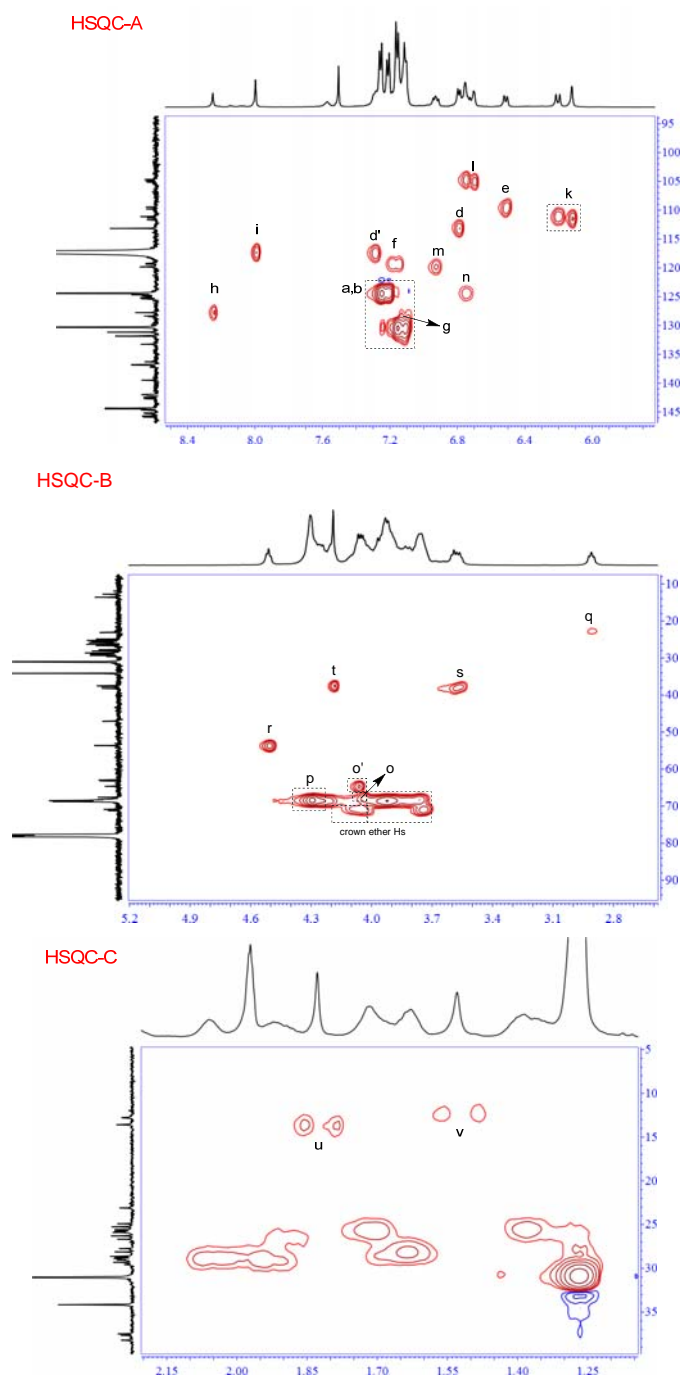

**Fig. S9** HSQC spectra ( $\text{CDCl}_3/\text{CD}_3\text{CN}=1:1$ , 600 MHz, 278 K) of [2]rotaxane  $[\text{R}][\text{PF}_6]$  after the addition of 4.0 equivalents of  $\text{KPF}_6$ .

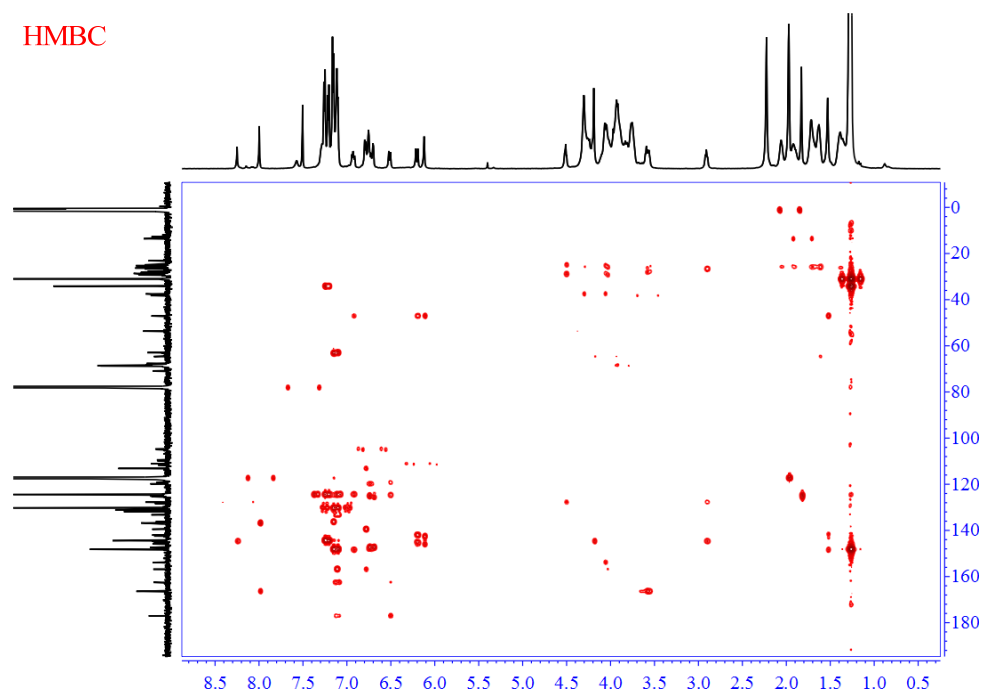

**Fig. S10** HMBC spectrum ( $\text{CDCl}_3/\text{CD}_3\text{CN}=1:1$ , 600 MHz, 278 K) of [2]rotaxane **[R]**[ $\text{PF}_6$ ] after the addition of 4.0 equivalents of  $\text{KPF}_6$ .

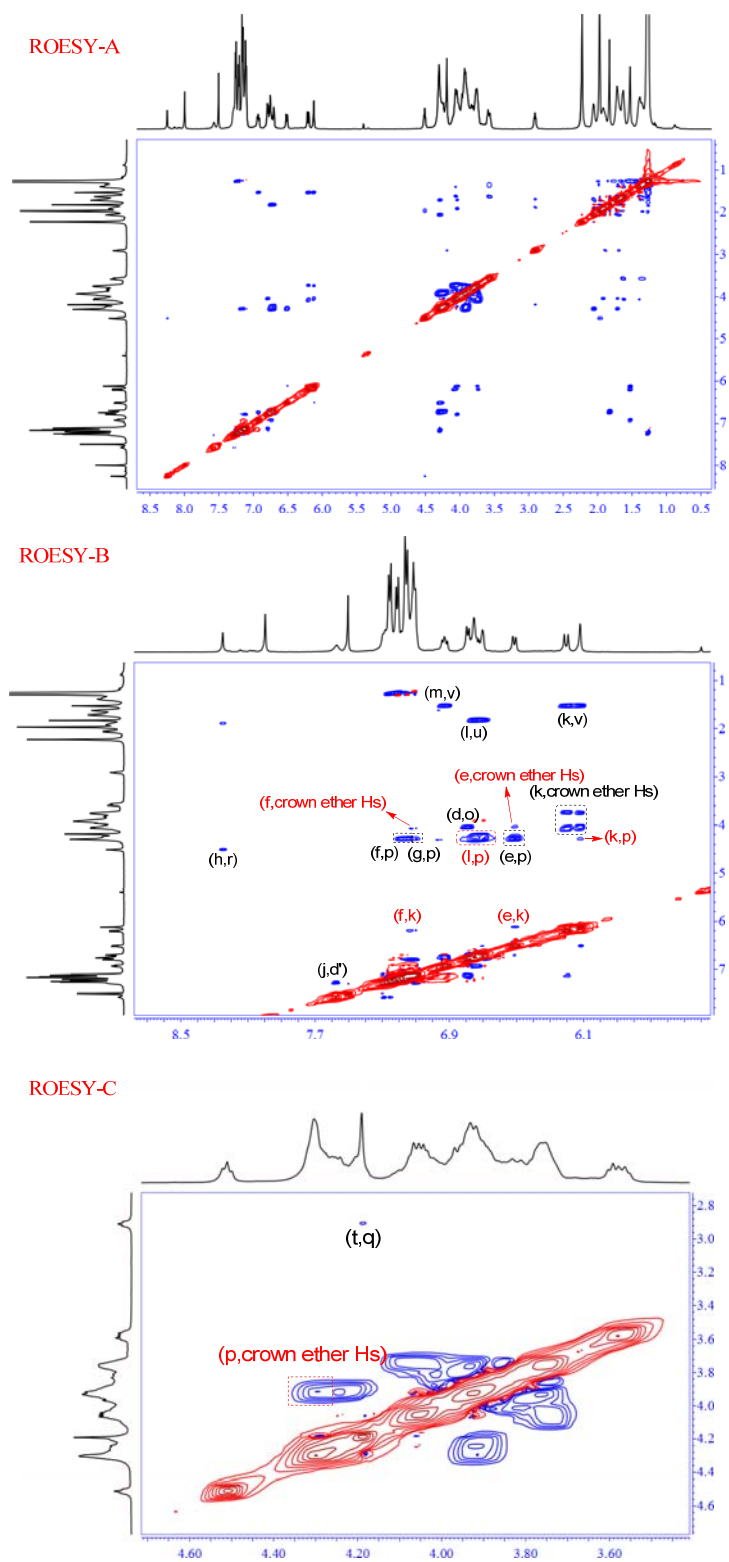

**Fig. S11** ROESY spectra ( $\text{CDCl}_3/\text{CD}_3\text{CN}=1:1$ , 600 MHz, 278 K) of [2]rotaxane **[R]**[PF<sub>6</sub>] after the addition of 4.0 equivalents of KPF<sub>6</sub>.

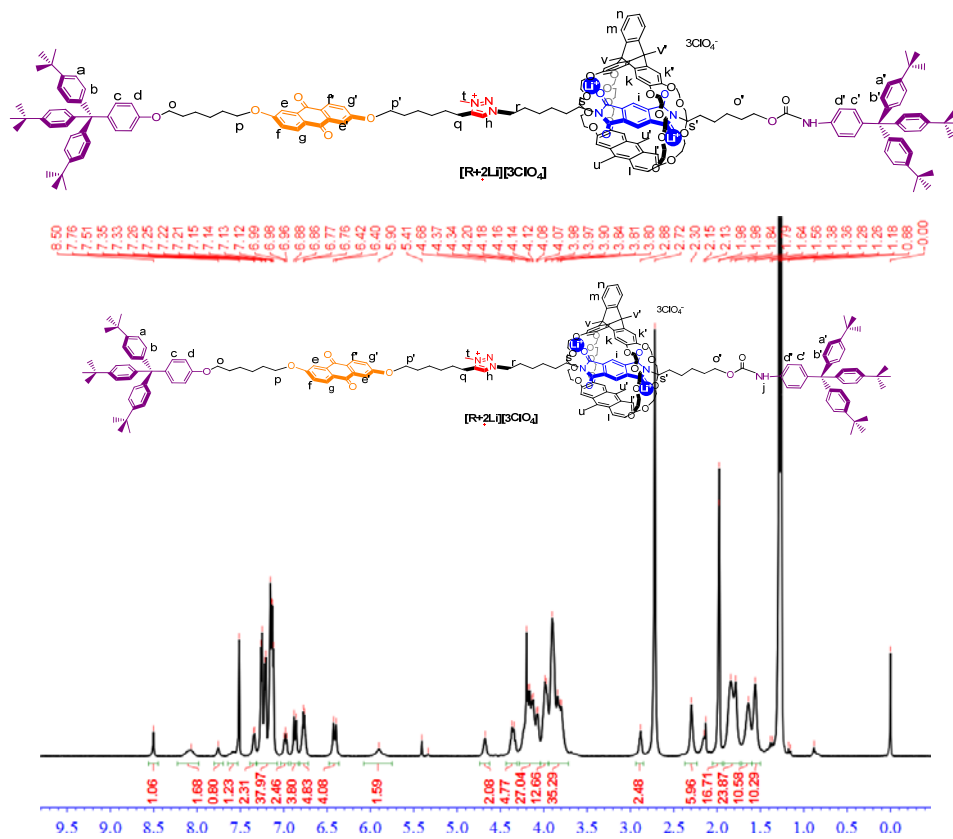

**Fig. S12**  $^1\text{H}$  NMR spectrum ( $\text{CDCl}_3/\text{CD}_3\text{CN}=1:1$ , 600 MHz, 278 K) of [2]rotaxane  $[\text{R}][\text{PF}_6]$  after the addition of 4.0 equivalents of  $\text{LiClO}_4$ .

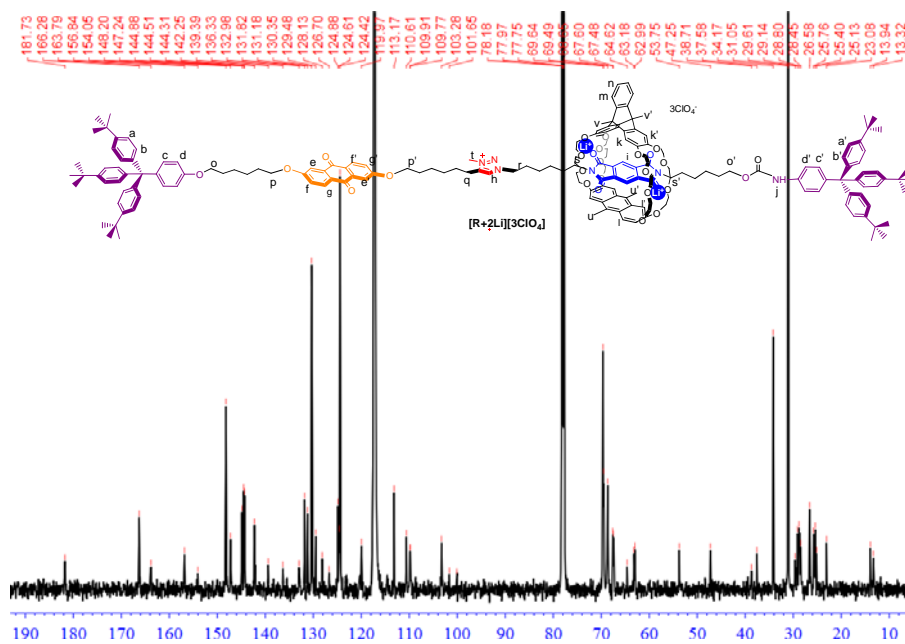

**Fig. S13**  $^{13}\text{C}$  NMR spectrum ( $\text{CDCl}_3/\text{CD}_3\text{CN}=1:1$ , 150 MHz, 278 K) of [2]rotaxane  $[\text{R}][\text{PF}_6]$  after the addition of 4.0 equivalents of  $\text{LiClO}_4$ .

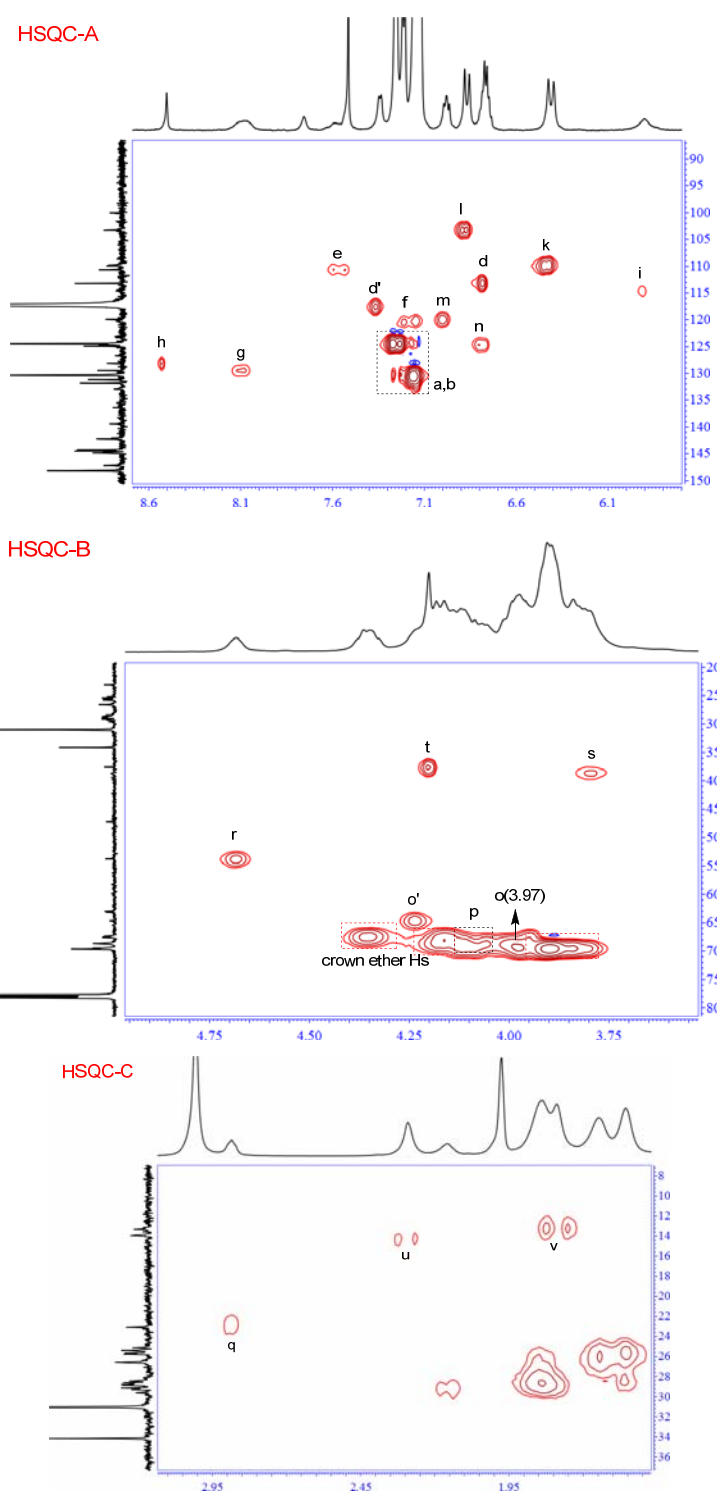

**Fig. S14** HSQC spectra ( $\text{CDCl}_3/\text{CD}_3\text{CN}=1:1$ , 600 MHz, 278 K) of [2]rotaxane  $[\mathbf{R}][\text{PF}_6]$  after the addition of 4.0 equivalents of  $\text{LiClO}_4$ .

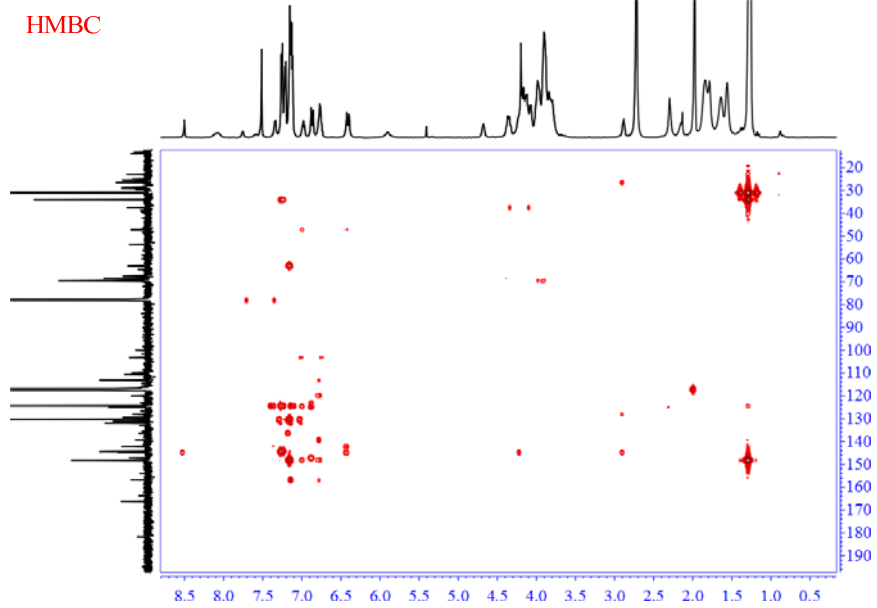

**Fig. S15** HMBC spectrum ( $\text{CDCl}_3/\text{CD}_3\text{CN}=1:1$ , 600 MHz, 278 K) of [2]rotaxane **[R]**[ $\text{PF}_6$ ] after the addition of 4.0 equivalents of  $\text{LiClO}_4$ .

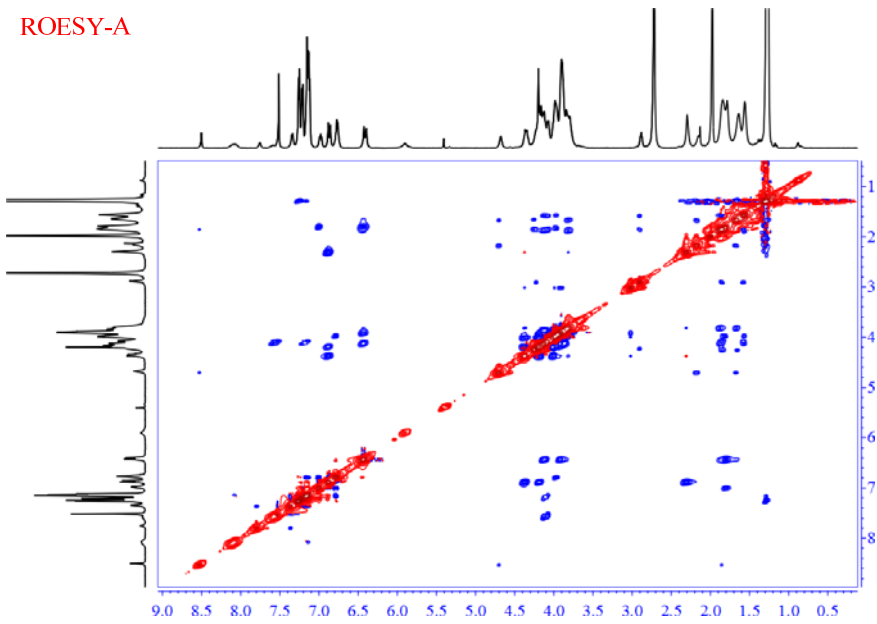

ROESY-B

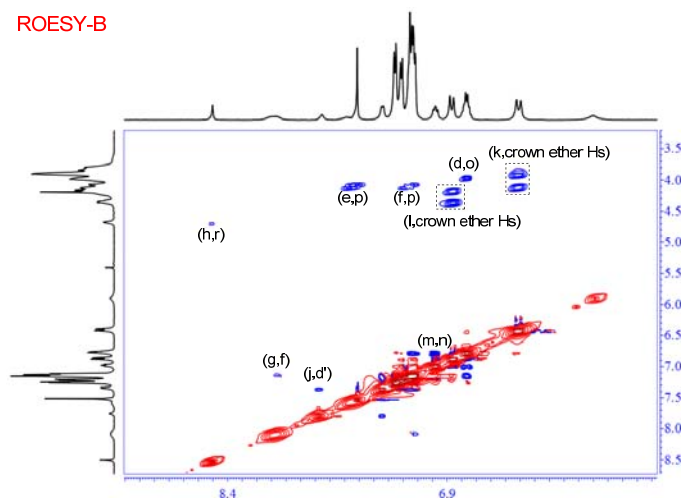

ROESY-C

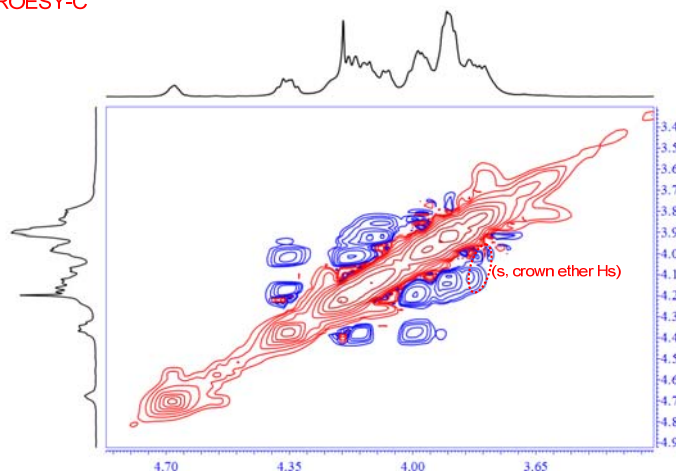

**Fig. S16** ROESY spectra (CDCl<sub>3</sub>/CD<sub>3</sub>CN=1:1, 600 MHz, 278 K) of [2]rotaxane [R][PF<sub>6</sub>] after the addition of 4.0 equivalents of LiClO<sub>4</sub>.

#### 4. HRMS Spectra for Three States of the [2]rotaxane

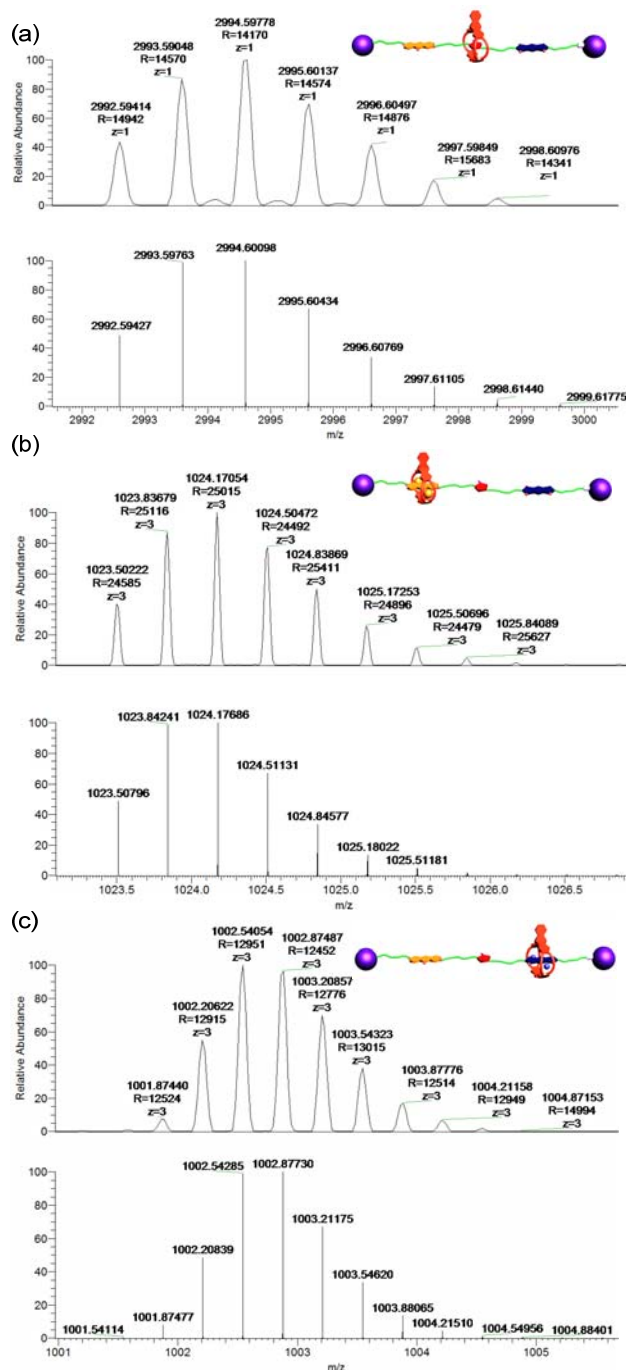

**Fig. S17** High-resolution electrospray ionization (HR-ESI) mass spectrometry: isotopic distribution with peaks at m/z (a) 2994.5978, (b) 1024.1705 and (c) 1002.8749 corresponding to the positively charged ion peaks  $[R]^+$ ,  $[R+2K]^{3+}$  and  $[R+2Li]^{3+}$ , respectively. Experimental (top) and calculated (bottom).



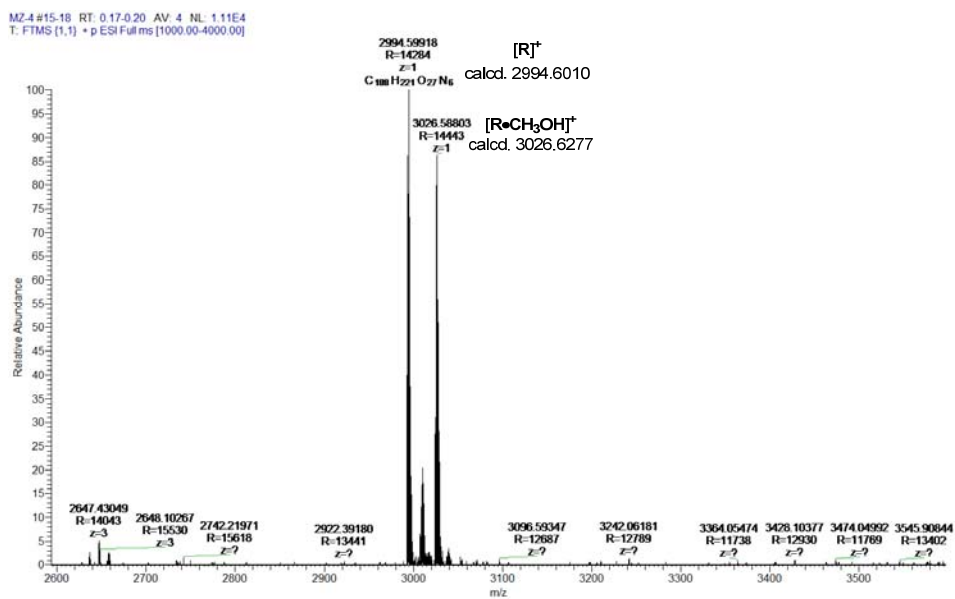

Fig. S18 HRMS spectrum of [2]rotaxane [R][PF<sub>6</sub>]

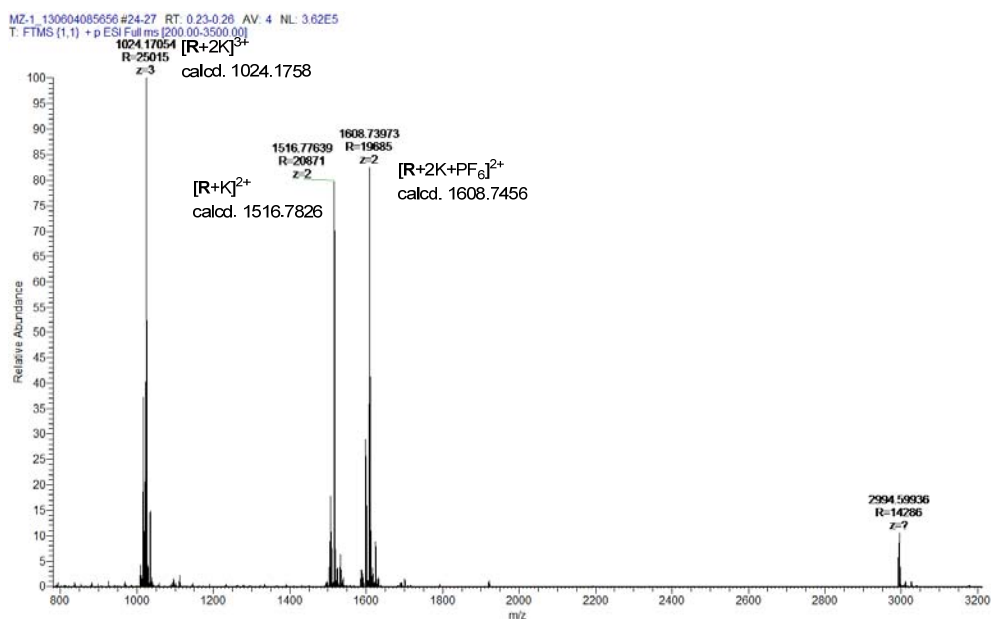

Fig. S19 HRMS spectrum of [2]rotaxane [R][PF<sub>6</sub>] in the presence of 4.0 equivalents of KPF<sub>6</sub>.

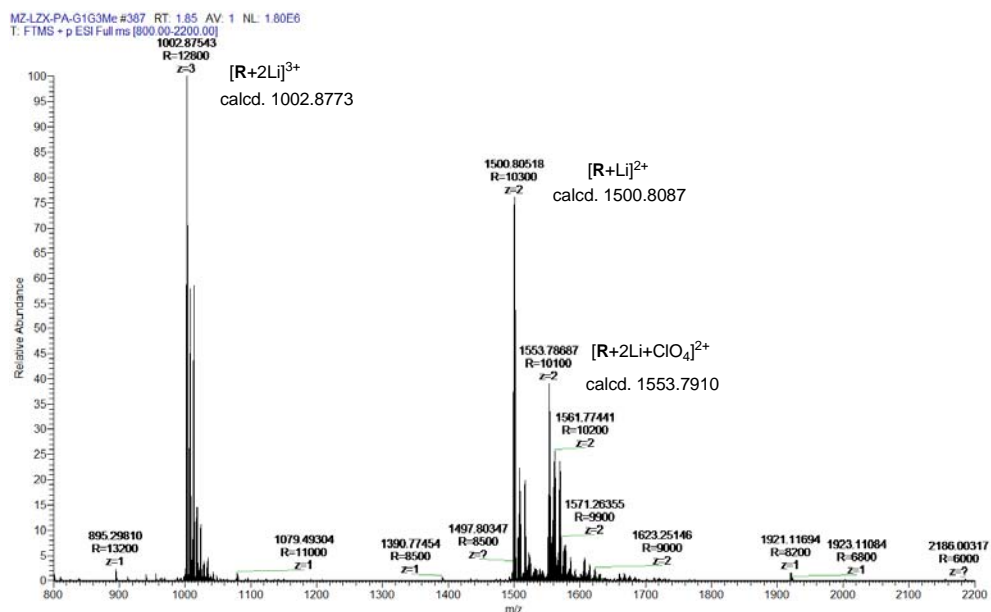

Fig. S20 HRMS spectrum of [2]rotaxane [R][PF<sub>6</sub>] in the presence of 4.0 equivalents of LiClO<sub>4</sub>.

## 5. NMR Spectra for Other New Compounds

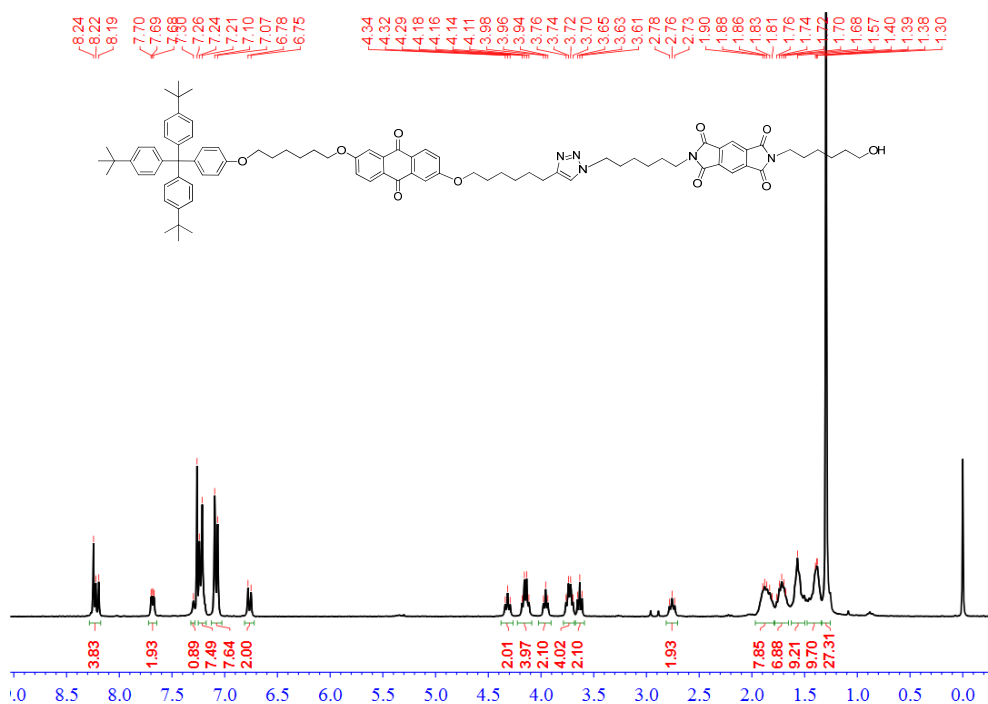

Fig. S21 <sup>1</sup>H NMR spectrum (CDCl<sub>3</sub>, 300 MHz, 298 K) of **3**.

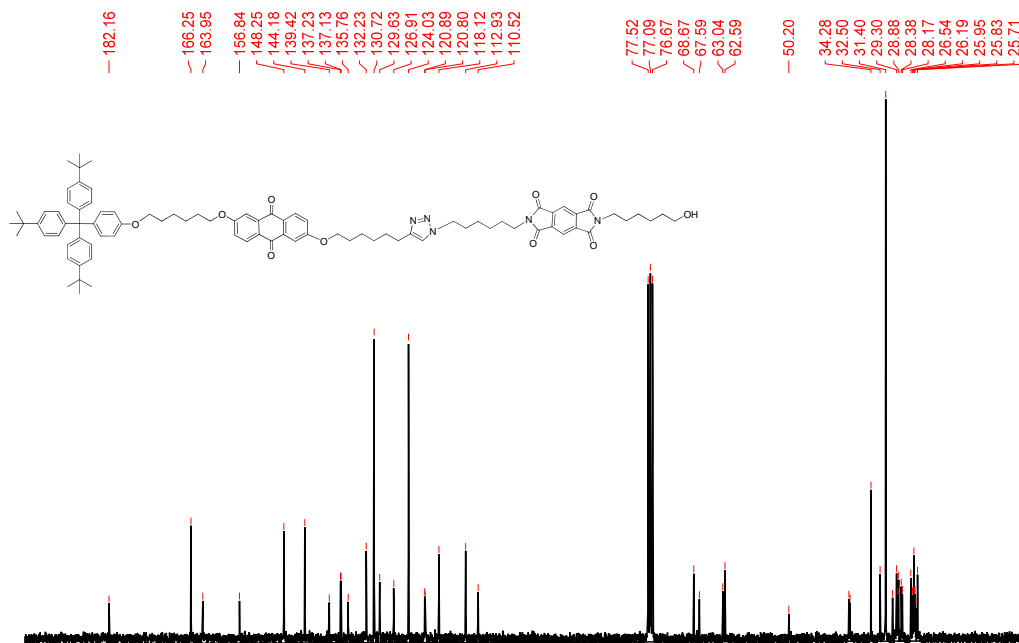

Fig. S22  $^{13}\text{C}$  NMR spectrum (CDCl<sub>3</sub>, 75 MHz, 298 K) of 3.

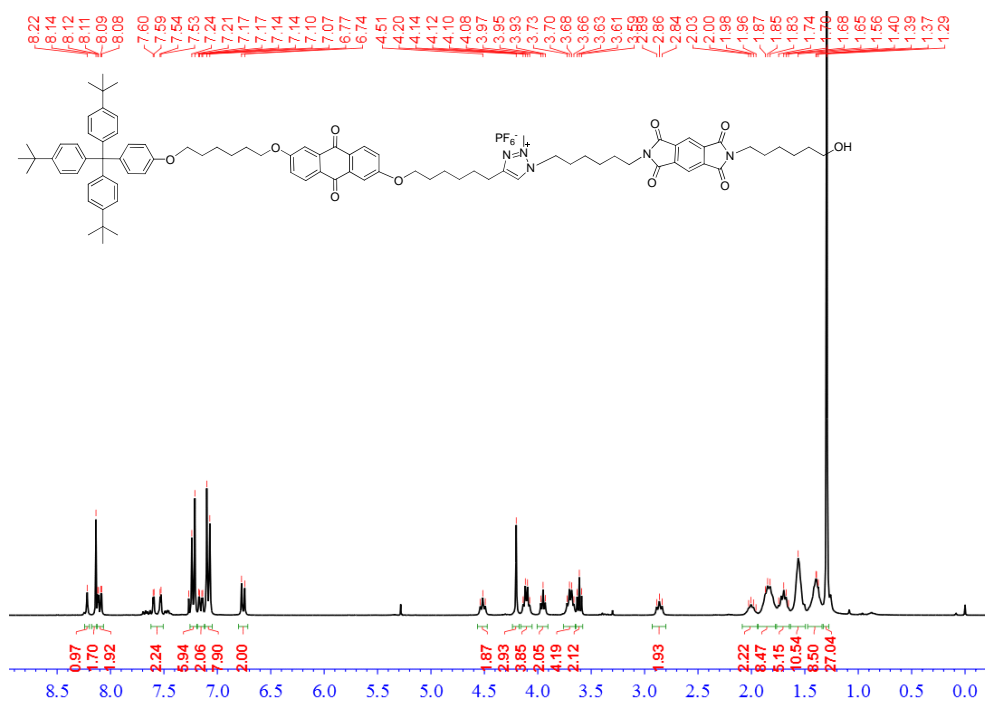

Fig. S23  $^1\text{H}$  NMR spectrum (CDCl<sub>3</sub>, 300 MHz, 298 K) of S1.

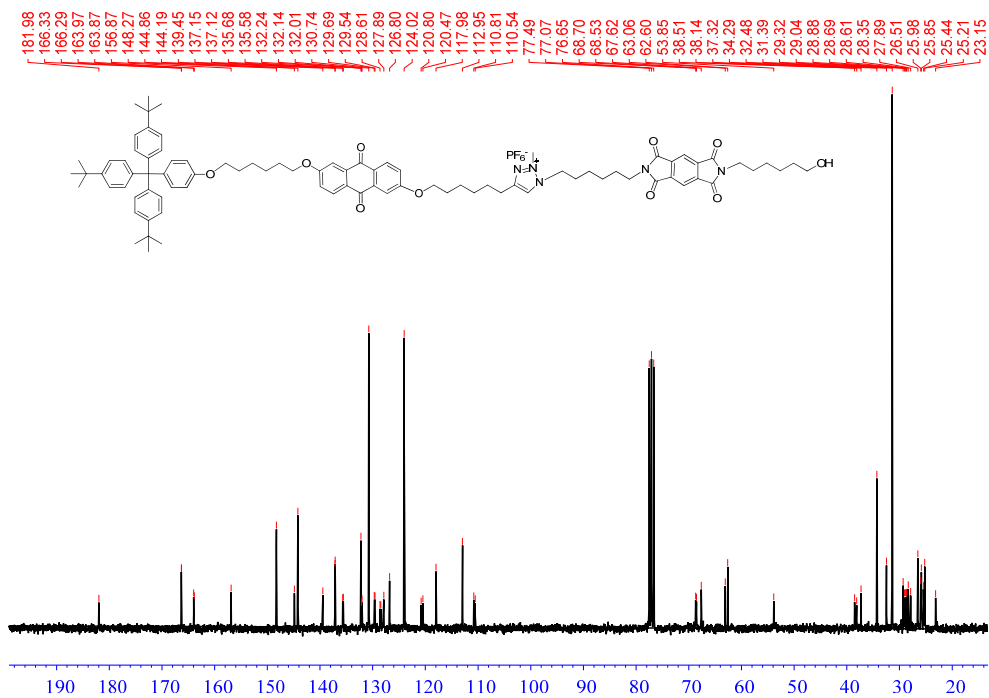

Fig. S24  $^{13}\text{C}$  NMR spectrum (CDCl<sub>3</sub>, 75 MHz, 298 K) of S1.

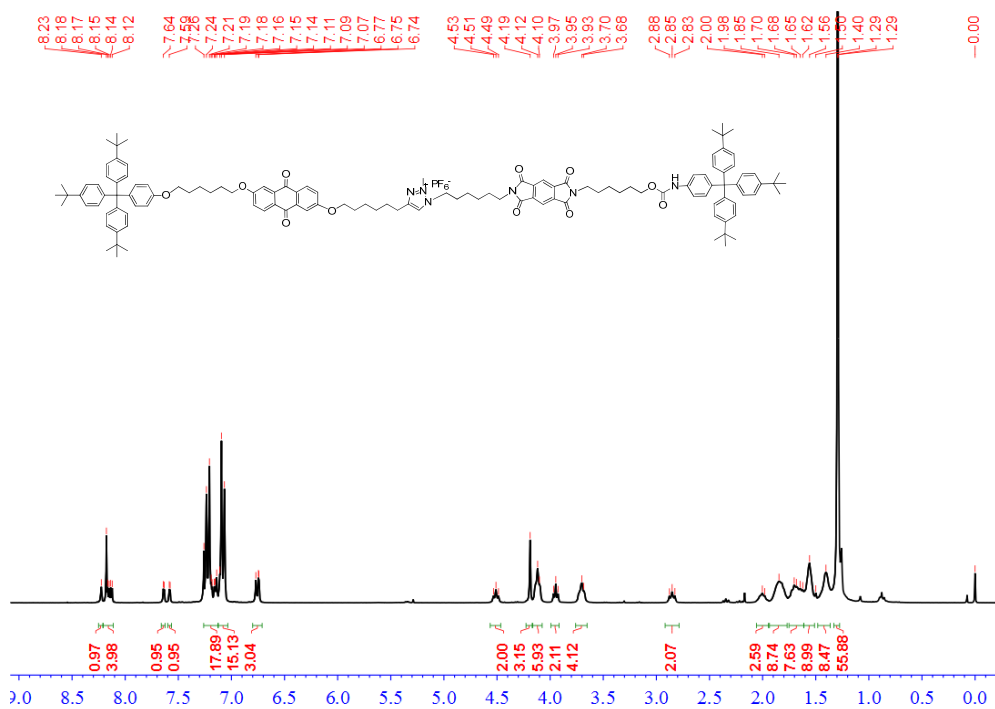

Fig. S25  $^1\text{H}$  NMR spectrum (CDCl<sub>3</sub>, 300 MHz, 298 K) of S.

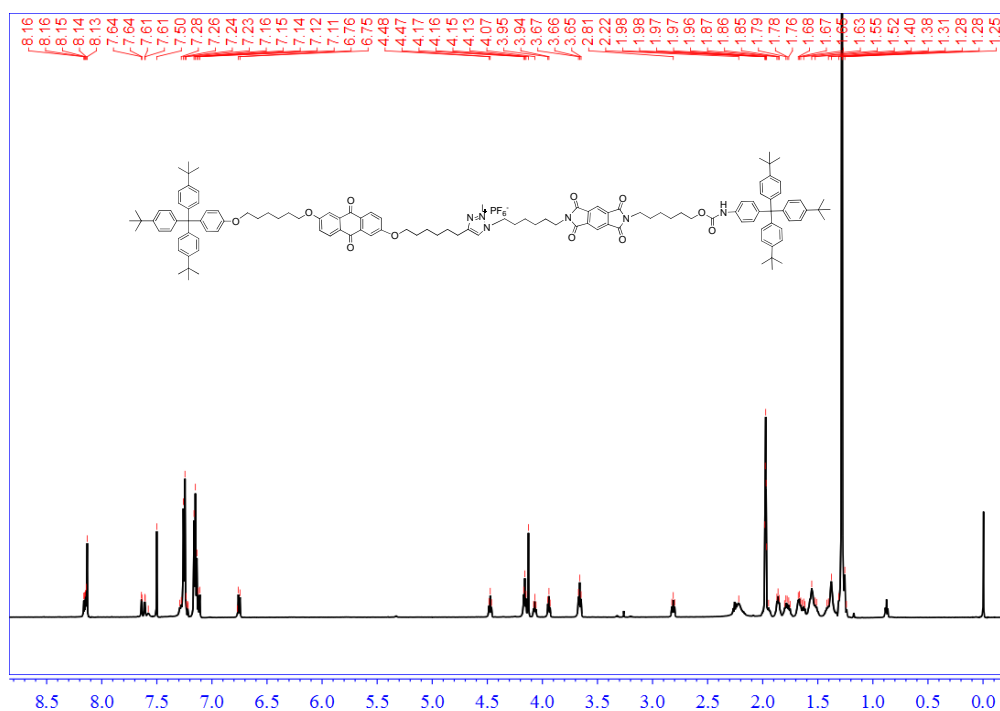

Fig. S26 <sup>1</sup>H NMR spectrum (CDCl<sub>3</sub>/CD<sub>3</sub>CN=1:1, 600 MHz, 278 K) of **S**.

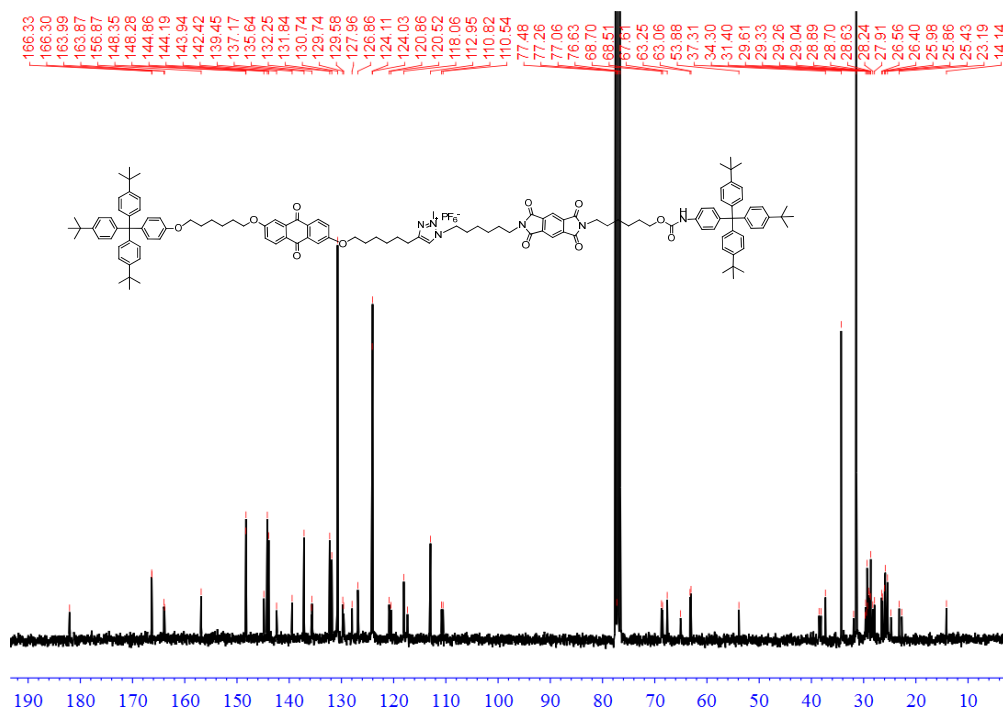

Fig. S27 <sup>13</sup>C NMR spectrum (CDCl<sub>3</sub>, 75 MHz, 298 K) of **S**.
